# Supplementary material for: Extensive Drug-Resistant Salmonella enterica Isolated From Poultry and Humans: Prevalence and Molecular Determinants Behind the Co-resistance to Ciprofloxacin and Tigecycline
Source: Front Microbiol. 2021 Nov 25;12:738784. doi: 10.3389/fmicb.2021.738784 (PMC8660588; doi:10.3389/fmicb.2021.738784)
Supplement: Supplementary file 7 [file Table_6.xlsx]

## Sheet: 5
Supplementary Table 6: Binary distances between pairs of isolates belonging to different hosts.
	C1	C10	C11		C13	C14	C15	C16	C17	C2	C3	C4	C5	C6	C7	C8	C9	D1	D2	D3	H1	H2	H3	H4	H5	P1	Q1	Q2	Q3
C1
C10	0.366667
C11	0.333333	0.291667
C12	0.3	0.444444	0.407407
C13	0.384615	0.5	0.428571	0.526316
C14	0.15625	0.387097	0.40625	0.322581	0.315789
C15	0.375	0.464286	0.307692	0.448276	0.459459	0.441176
C16	0.277778	0.485714	0.5	0.472222	0.282051	0.25	0.486486
C17	0.133333	0.37931	0.451613	0.310345	0.435897	0.16129	0.484848	0.333333
C2	0.2	0.392857	0.413793	0.37931	0.405405	0.225806	0.4	0.242424	0.266667
C3	0.3125	0.392857	0.413793	0.433333	0.447368	0.382353	0.285714	0.473684	0.424242	0.333333
C4	0.205882	0.470588	0.485714	0.411765	0.35	0.176471	0.382353	0.194444	0.264706	0.21875	0.323529
C5	0.125	0.454545	0.424242	0.393939	0.375	0.151515	0.411765	0.222222	0.242424	0.25	0.352941	0.147059
C6	0.3125	0.448276	0.296296	0.37931	0.487179	0.382353	0.285714	0.388889	0.424242	0.333333	0.387097	0.323529	0.25
C7	0.205882	0.424242	0.441176	0.411765	0.263158	0.228571	0.382353	0.333333	0.264706	0.272727	0.272727	0.171429	0.2	0.371429
C8	0.3125	0.448276	0.413793	0.433333	0.447368	0.382353	0.451613	0.294118	0.424242	0.275862	0.484848	0.323529	0.30303	0.333333	0.323529
C9	0.206897	0.28	0.166667	0.333333	0.459459	0.34375	0.230769	0.444444	0.333333	0.344828	0.285714	0.382353	0.3125	0.285714	0.333333	0.4
D1	0.205882	0.424242	0.441176	0.411765	0.307692	0.121212	0.472222	0.142857	0.212121	0.21875	0.416667	0.171429	0.147059	0.371429	0.222222	0.272727	0.382353
D2	0.34375	0.533333	0.448276	0.413793	0.432432	0.411765	0.37931	0.323529	0.40625	0.310345	0.46875	0.4	0.382353	0.419355	0.444444	0.310345	0.37931	0.352941
D3	0.275862	0.36	0.384615	0.28	0.552632	0.3	0.37037	0.411765	0.344828	0.357143	0.413793	0.34375	0.375	0.413793	0.441176	0.466667	0.307692	0.393939	0.392857
H1	0.16129	0.344828	0.366667	0.4375	0.324324	0.242424	0.40625	0.257143	0.28125	0.172414	0.290323	0.285714	0.212121	0.393939	0.235294	0.290323	0.3	0.181818	0.266667	0.366667
H2	0.28125	0.516129	0.321429	0.5	0.333333	0.30303	0.366667	0.361111	0.393939	0.3	0.454545	0.342857	0.272727	0.354839	0.342857	0.354839	0.310345	0.294118	0.387097	0.53125	0.3125
H3	0.25	0.37931	0.344828	0.310345	0.394737	0.272727	0.333333	0.378378	0.363636	0.266667	0.322581	0.314286	0.294118	0.266667	0.314286	0.424242	0.333333	0.361111	0.454545	0.285714	0.28125	0.393939
H4	0.352941	0.37931	0.344828	0.419355	0.351351	0.371429	0.275862	0.5	0.411765	0.375	0.206897	0.361111	0.388889	0.322581	0.212121	0.424242	0.333333	0.405405	0.542857	0.5	0.382353	0.393939	0.3125
H5	0.428571	0.413793	0.575758	0.451613	0.378378	0.4	0.515152	0.314286	0.393939	0.40625	0.40625	0.388889	0.459459	0.5	0.432432	0.542857	0.515152	0.432432	0.484848	0.433333	0.411765	0.594595	0.34375	0.441176
P1	0.266667	0.407407	0.37037	0.333333	0.416667	0.290323	0.413793	0.352941	0.387097	0.222222	0.344828	0.333333	0.258065	0.285714	0.333333	0.4	0.357143	0.333333	0.433333	0.307692	0.241379	0.419355	0.148148	0.387097	0.366667
Q1	0.166667	0.357143	0.321429	0.451613	0.378378	0.25	0.419355	0.314286	0.290323	0.178571	0.3	0.294118	0.21875	0.354839	0.242424	0.3	0.310345	0.242424	0.333333	0.37931	0.0714286	0.322581	0.290323	0.34375	0.470588	0.25
Q2	0.305556	0.514286	0.485714	0.363636	0.263158	0.228571	0.513514	0.289474	0.314286	0.371429	0.416667	0.222222	0.25	0.459459	0.222222	0.323529	0.472222	0.171429	0.352941	0.441176	0.285714	0.388889	0.405405	0.405405	0.432432	0.382353	0.342857
Q3	0.25	0.433333	0.4	0.419355	0.394737	0.21875	0.4375	0.285714	0.363636	0.322581	0.470588	0.212121	0.1875	0.322581	0.264706	0.206897	0.387097	0.264706	0.454545	0.4	0.333333	0.34375	0.3125	0.411765	0.485714	0.333333	0.290323	0.314286
